# Supplementary material for: Effect of type of diet on blood and plasma taurine concentrations, cardiac biomarkers, and echocardiograms in 4 dog breeds
Source: PubMed Central journal article supplement (PMC7995416; doi:10.1111/jvim.16075), 2021-02-27
Supplement: JVIM-35-771-s002.pdf [file JVIM-35-771-s002.pdf]

**Table S1.** Grain-free and grain-inclusive diets that were fed to enrolled dogs.

| <b>Grain-free diets</b>                                                                          | <b>Grain-inclusive diets</b>                                                        |
|--------------------------------------------------------------------------------------------------|-------------------------------------------------------------------------------------|
| 4Health Grain Free Chicken & Vegetables Formula Adult                                            | 4health Original Chicken & Rice Formula Adult                                       |
| Acana Heritage Free-Run Poultry Formula                                                          | 4health Original Performance                                                        |
| Acana Light and Fit Formula                                                                      | 4health Original Small Bites Formula Adult                                          |
| Acana Meadowland                                                                                 | Actr1um Holistic                                                                    |
| Aldi Pure Being Grain Free Salmon and Sweet Potato                                               | American Journey Active Life Formula Large Breed Chicken, Brown Rice and Vegetables |
| Earthborn Holistic Primitive Natural                                                             | Avoderm Adult Chicken Meal & Brown Rice Formula                                     |
| Fromm Salmon Tunalini Recipe                                                                     | Bil-Jac Adult Select Formula                                                        |
| Honest Kitchen Zeal Grain Free Fish Recipe Dehydrated                                            | Diamond Naturals All Life Stages Dog Chicken & Rice Formula                         |
| Merrick Grain Free Real Duck and Sweet Potato Recipe                                             | Eukanuba Small Bites Chicken dry                                                    |
| Merrick Grain Free Real Lamb and Sweet Potato Recipe                                             | Evanger's Chicken and Brown Rice Recipe                                             |
| Natures Recipe Grain Free Chicken, Sweet Potato, & Pumpkin Recipe                                | Farmina N & D Ancestral Grain Chicken & Pomegranate Medium & Maxi Adult Dry         |
| Nutrisource Pure Vita Salmon & Peas Entrée                                                       | Fromm Adult Gold Dry                                                                |
| Orijen Original Adult                                                                            | Fromm Chicken A La Veg Recipe                                                       |
| Redford Naturals Limited Ingredient Diet Grain Free Large Breed Lamb & Sweet Potato Recipe Adult | Fromm Duck A La Veg Recipe                                                          |
| Simply Nourish Limited Ingredient Diet Salmon & Sweet Potato Recipe                              | Fromm Pork & Applesauce Formula                                                     |
| Taste of the Wild High Prairie Canine Recipe with Roasted Bison and Roasted Venison              | Halo Holistic Wild Salmon and Whitefish Recipe Adult                                |
| Taste of the Wild Southwest Canyon Canine Recipe with Wild Boar                                  | Hills Science Diet Digestive Care i/d Low Fat                                       |
| Taste of the Wild Pacific Stream Canine Recipe with Smoked Salmon                                | Hill's Science Diet Digestive Care i/d                                              |
| Taste of the Wild Pine Forest Canine Recipe with Venison & Legumes                               | Iams ProActive Health Adult Minichunks                                              |
| Wellness Core Grain Free                                                                         | Instinct Be Natural Real Chicken & Brown Rice Recipe                                |
| Zignature Salmon Limited Ingredient Formula                                                      | Kirkland Signature Adult Formula Chicken, Rice, & Vegetable                         |
|                                                                                                  | Nutrisource Adult Chicken & Rice Recipe                                             |
|                                                                                                  | Nutro Wholesome Essentials Large Breed Adult Pasture-Fed Lamb & Rice Recipe         |

|  |                                                                            |
|--|----------------------------------------------------------------------------|
|  | Nutro Ultra Chicken/Lamb/Salmon Small Breed Weight Management              |
|  | Purina Beneful Healthy Puppy Dry Dog Food with Farm-Raised Chicken         |
|  | Purina One Smartblend Digestive Health Formula with Real Chicken           |
|  | Purina One Smartblend Chicken & Rice Formula                               |
|  | Purina One Smartblend Lamb & Rice Formula                                  |
|  | Purina Pro Plan Savor Shredded Adult Beef & Rice Formula                   |
|  | Purina Pro Plan Bright Mind Chicken & Rice Formula                         |
|  | Purina Pro Plan Savor Shredded Blend Chicken and Rice Savor Formula        |
|  | Purina Pro Plan Focus Large Breed Chicken & Rice Formula                   |
|  | Purina Pro Plan Focus Puppy Large Breed Chicken & Rice Formula             |
|  | Purina Pro Plan Focus Adult Sensitive Skin & Stomach Salmon & Rice Formula |
|  | Purina Pro Plan Focus Small Bites Lamb & Rice Formula                      |
|  | Purina Pro Plan Focus Adult Small Breed Formula Chicken and rice           |
|  | Purina Pro Plan Sport Active All Life Stages 26/16 Formula                 |
|  | Purina Pro Plan Sport Performance 30/20 Salmon & Rice Formula              |
|  | Purina Pro Plan Sport All Life Stage Performance 30/20 Formula Chicken     |
|  | Purina Pro Plan Veterinary Diets HA Hydrolyzed Canine Formula (Vegetarian) |
|  | Royal Canin Veterinary Care Nutrition Weight Control                       |
|  | Royal Canin Golden Retriever Adult                                         |
|  | Royal Canin Miniature Schnauzer Adult                                      |
|  | Royal Canin Golden Retriever Puppy                                         |
|  | Royal Canin Satiety Support Weight Management                              |
|  | Royal Canin Urinary SO                                                     |
|  | Member's Mark Exceed DryDog Food, Chicken & Rice                           |
|  | SportMix High Energy 26/18                                                 |
|  | Victor Hi Pro Plus Active 88-2-10 Dog & Puppy                              |
|  | Victor Performance Adult Maintenance with Glucosamine and Chondroitin      |
|  | Victor Professional All Life Stages                                        |
